# Supplementary material for: Mechanisms of Isothiocyanate Detoxification in Larvae of Two Belowground Herbivores, Delia radicum and D. floralis (Diptera: Anthomyiidae)
Source: Front Physiol. 2022 Apr 29;13:874527. doi: 10.3389/fphys.2022.874527 (PMC9098826; doi:10.3389/fphys.2022.874527)
Supplement: Supplementary file 1 [file Table1.xlsx]

## Sheet: Tabelle1
Table S1. Selected genes potentially involved in the mercapturic acid pathway. Genes were expressed in Delia radicum (DRa) and D. floralis (DFl) larvae feeding on diet with 2-phenylethyl-iosthiocyanate (ITC) or without (control). Number of mapped RNASeq reads were counted and statitically analysed.
gene_ID	annotation	read mean DRa control	read mean DRa_ITC	read mean DFl control	read mean DFl ITC	DRa_C1	D_radicum_control_R2	D_radicum_control_R3	D_radicum_ITC_R1	D_radicum_ITC_R2	D_radicum_ITC_R3	D_floralis_control_R1	D_floralis_control_R2	D_floralis_control_R3	D_floralis_ITC_R1	D_floralis_ITC_R2	D_floralis_ITC_R3	baseMean.DRa	log2FoldChange.DRa	lfcSE.DRa	stat.DRa	pvalue.DRa	padj.DRa	baseMean.DFl	log2FoldChange.DFl	lfcSE.DFl	stat.DFl	pvalue.DFl	padj.DFl
gene_29992	glutamyltransferase	1689.79	1200.3	1060.8	1361.2	1870.55	1735.78	1463.04	928.426	1740.31	932.159	665.152	1572.54	944.7	1312.1	1045.44	1726.06	1445.04	-0.49341	0.329021	-1.49963	0.133709	0.502016	1211	0.360454	0.427424	0.843319	0.39905	0.685465
gene_32809	glutamyltransferase	11.4826	12.6708			23.2657	2.77579	8.40624	19.7979	4.27249	13.9421							12.0767	0.138286	1.14949	0.120302	0.904244
gene_32811	glutamyltransferase	2172.7	2783.74	1124.05	1143.24	2720.62	1917.6	1879.88	1840.61	4083.08	2427.55	1033.97	1360.23	977.943	1180.66	986.832	1262.23	2478.22	0.357453	0.367679	0.972187	0.330958	0.736331	1133.64	0.0250871	0.236806	0.105939	0.915631	0.971464
gene_36579	glutamyltransferase	4537.73	6120.05	5059.99	5790.66	3820.05	6532.82	3260.32	4789.83	7279.45	6290.86	8755.79	2611.28	3812.9	6776.24	5959.46	4636.29	5328.89	0.431531	0.343146	1.25757	0.208546	0.615581	5425.33	0.194464	0.52094	0.373294	0.70893	0.878743
gene_36580	glutamyltransferase	454.34	1339	2124.88	1227.15	415.122	522.281	425.616	966.036	807.057	2243.9	1793.93	2781.45	1799.25	1123.4	1273.26	1284.79	896.669	1.55928	0.4509	3.45816	0.000543873	0.0163065	1676.01	-0.791414	0.270158	-2.92945	0.00339561	0.0554295
gene_22616	glutathione-S-transferase	553.644	557.049	822.966	474.854	551.184	612.834	496.913	479.984	582.078	609.086	631.811	998.642	838.444	586.813	414.656	423.093	555.347	0.00824498	0.191308	0.0430979	0.965623	0.994537	648.91	-0.79326	0.299836	-2.64564	0.00815356	0.0899237
gene_22617	glutathione-S-transferase	2270.69	2283.08	3674.19	3159.14	1912.89	2143.42	2755.76	2707.96	2420.77	1720.5	3802.95	3561.09	3658.53	3130.81	3395.32	2951.31	2276.88	0.00802566	0.265031	0.030282	0.975842	0.995666	3416.67	-0.21786	0.128841	-1.69092	0.0908526	0.335809
gene_23160	glutathione-S-transferase	324.512	309.953	163.801	199.705	333.229	351.741	288.566	321.399	300.691	307.769	137.69	161.508	192.204	204.616	240.571	153.927	317.233	-0.0671635	0.174029	-0.385934	0.699546	0.936084	181.753	0.288475	0.308757	0.93431	0.350144	0.645093
gene_33724	glutathione-S-transferase	1258.51	4052.88	3429.48	2203.7	1100.91	1271.03	1403.59	4329.22	1930.14	5899.27	1966.07	5358.1	2964.25	2148.13	1091.13	3371.83	2655.69	1.68729	0.428872	3.93424	8.34607e-05	0.0043869	2816.59	-0.638003	0.57665	-1.10639	0.268556	0.568916
gene_34034	glutathione-S-transferase	95.0793	81.1389	142.366	198.99	179.812	21.677	83.7488	117.82	101.819	23.7773	199.806	100.612	126.68	179.019	254.422	163.528	88.1091	-0.22882	0.937176	-0.244159	0.807108	0.966424	170.678	0.477458	0.403984	1.18187	0.237256	0.537612
gene_34107	glutathione-S-transferase	159.718	279.319	561.877	108.753	183.511	206.115	89.5266	381.219	127.726	329.011	86.9411	977.644	621.045	66.6559	40.5167	219.087	219.518	0.80517	0.563556	1.42873	0.153081	0.538783	335.315	-2.37033	0.967193	-2.45073	0.0142565	0.12294
gene_34108	glutathione-S-transferase	73.3859	361.96	15.3353	3.74211	73.433	50.3526	96.3723	503.79	137.239	444.852	0	29.2941	16.712	0.757915	1.43733	9.0311	217.673	2.3034	0.588057	3.91696	8.96712e-05	0.00465515	9.53873	-2.04724	1.78149	-1.14917	0.250486
gene_41268	glutathione-S-transferase	158.629	270.057	189.664	14.5645	185.914	150.581	139.391	400.985	178.789	230.397	19.3217	335.558	214.113	22.0945	15.1107	6.48836	214.343	0.767082	0.408409	1.87822	0.0603513	0.33502	102.114	-3.69396	1.01185	-3.65071	0.00026152	0.0114553
gene_46609	glutathione-S-transferase	665.532	703.935	819.229	817.797	661.274	709.173	626.147	664.257	762.349	685.199	803.176	793.297	861.214	859.08	878.133	716.178	684.733	0.0805449	0.142662	0.564585	0.572356	0.888036	818.513	-0.00195812	0.16958	-0.0115469	0.990787	0.996546
gene_52573	glutathione-S-transferase	174.873	1925.27	794.31	250.338	147.676	133.232	243.71	2584.31	454	2737.49	393.194	1149.89	839.846	170.726	92.3656	487.922	1050.07	3.46126	0.666319	5.1946	2.05158e-07	3.31804e-05	522.324	-1.66665	0.730822	-2.28052	0.0225771	0.158424
gene_52924	glutathione-S-transferase	3269.52	2488.89	3185.01	2181.57	3336.88	3387.54	3084.14	2468.02	2275.11	2723.55	3085.29	4448.43	2021.31	2371.52	2277.3	1895.9	2879.21	-0.393674	0.129	-3.05174	0.00227521	0.0438969	2683.29	-0.545488	0.363573	-1.50035	0.133523	0.406435
gene_55765	glutathione-S-transferase	33130.1	36233	43135.2	35883.7	30836.2	34573.7	33980.4	37254.7	35200.4	36243.8	40190.2	47704.7	41510.7	30430.8	34875.2	42345	34681.5	0.129178	0.0969919	1.33184	0.182912	0.579136	39509.4	-0.265536	0.210482	-1.26156	0.207107	0.502397
gene_66953	glutathione-S-transferase	454.964	619.905	1807.5	890.065	531.255	454.835	378.801	536.335	619.721	703.659	1238.09	2182.1	2002.32	955.512	804.124	910.558	537.434	0.4453	0.227781	1.95495	0.0505887	0.300885	1348.78	-1.02152	0.299807	-3.40727	0.000656168	0.0210324
gene_69351	glutathione-S-transferase	500.555	3361.07	2972.63	700.513	491.725	345.271	664.667	4528.78	426.436	5128	539.524	5208.09	3170.27	367.666	159.94	1573.93	1930.81	2.74742	0.790875	3.4739	0.000512952	0.0157768	1836.57	-2.08545	1.01994	-2.04468	0.0408868	0.219582
gene_70409	glutathione-S-transferase	789.798	4936.46	285.118	27.7258	835.831	370.464	1163.1	6923.68	903.996	6981.71	3.02249	610.525	241.805	2.26372	0	80.9136	2863.13	2.64398	0.758948	3.48374	0.000494454	0.0154874	156.422	-3.36487	1.97971	-1.69968	0.0891917	0.332426
gene_71256	glutathione-S-transferase	204.418	352.314	188.517	35.3245	167.681	244.439	201.135	456.723	238.587	361.631	20.2208	405.053	140.277	39.382	29.4671	37.1244	278.366	0.785547	0.351259	2.23637	0.0253272	0.201516	111.921	-2.41371	0.965916	-2.49888	0.0124587	0.113871
gene_75450	glutathione-S-transferase	959.151	6521.45	617.617	85.2658	1307.72	301.011	1268.72	8310.34	1515.28	9738.72	58.5769	1106.81	687.46	37.0781	23.7674	194.952	3740.3	2.76539	0.770139	3.59077	0.000329701	0.0114815	351.441	-2.85836	1.12574	-2.5391	0.0111138	0.107053
gene_75460	glutathione-S-transferase	3346.5	9352.67	3683.52	585.789	2310.91	3455.28	4273.3	12273.3	5481.98	10302.7	347.329	6705.07	3998.17	251.898	166.95	1338.52	6349.59	1.4828	0.393841	3.76497	0.000166567	0.00711081	2134.66	-2.65286	1.10677	-2.39694	0.0165325	0.133371
gene_75463	glutathione-S-transferase	984.951	6506.94	1212.2	300.692	826.545	655.332	1472.98	8521.34	2215.2	8784.27	279.357	2078.41	1278.84	146.248	123.067	632.763	3745.94	2.72402	0.58183	4.68181	2.84351e-06	0.000316741	756.448	-2.01174	0.907354	-2.21715	0.0266131	0.174254
gene_14986	dipeptidase	62.9305	320.846	877.527	734.843	37.5734	80.4712	70.747	613.07	175.849	173.62	244.67	1717.15	670.762	1366.14	691.941	146.454	191.888	2.35067	0.663632	3.54212	0.000396919	0.0133171	806.185	-0.255314	0.942278	-0.270955	0.786426	0.915598
gene_14987	dipeptidase	20948	21900.1	7815.46	45767.7	8627.88	7866.69	46349.3	27431.7	28319.1	9949.5	5670.99	10125.5	7649.9	81425.3	51222.2	4655.6	21424	0.0641452	0.763167	0.0840513	0.933016	0.990252	26791.6	2.54995	0.883804	2.8852	0.00391161	0.0600447
gene_14988	dipeptidase	5701.64	13921.7	18710.3	11170.7	7094.42	5561.56	4448.94	15833.2	8759.67	17172.3	23264.3	14475.5	18391	13377.1	11775.4	8359.61	9811.67	1.28784	0.339404	3.79442	0.000147991	0.0066379	14940.5	-0.744123	0.313618	-2.3727	0.0176585	0.139057
gene_21695	dipeptidase	37.6712	14.2128	12.6928	21.7626	14.7204	27.4489	70.8443	10.478	9.50336	22.6569	10.1004	14.6283	13.3496	14.3783	28.8043	22.1053	25.942	-1.40346	0.878664	-1.59726	0.110207	0.45691	17.2277	0.791195	0.604703	1.3084	0.190737
gene_32813	dipeptidase	8758.93	9011.5	7214.96	4391.3	8950.18	8933.25	8393.37	8943.73	8293.56	9797.22	4223.33	10491.8	6929.72	4805.01	4649.52	3719.37	8885.22	0.0409609	0.116276	0.352274	0.724633	0.9433	5803.13	-0.716148	0.402678	-1.77846	0.0753277	0.304276
gene_41498	dipeptidase	1371.77	2200.7	668.821	493.347	1170.12	1450.84	1494.35	1842.55	3024.07	1735.48	663.599	722.749	620.114	537.427	533.903	408.71	1786.24	0.682046	0.293097	2.32703	0.0199637	0.174819	581.084	-0.436687	0.209392	-2.0855	0.0370237	0.207792
gene_43929	dipeptidase	5.26307	4.69035	14.7804	16.3216	6.82789	3.17201	5.78932	3.90213	3.93317	6.23575	17.6892	25.3517	1.30016	17.106	18.273	13.5858	4.97671	-0.191105	1.01951	-0.187448	0.851309		15.551	0.152738	1.01931	0.149844	0.880888
gene_46409	dipeptidase	777.329	845.821	790.386	969.879	921.991	737.479	672.517	978.54	802.249	756.673	984.985	659.289	726.882	1036.96	1184.69	687.987	811.575	0.121628	0.218322	0.557102	0.577458	0.89123	880.132	0.294928	0.328907	0.896693	0.369883	0.661446
gene_51589	dipeptidase	14800.5	16615	9077.78	7316.13	15171.3	15444.4	13785.9	15179	14159.8	20506.1	7775.21	10604.4	8853.76	7395.92	6449.8	8102.66	15707.8	0.166815	0.199396	0.836601	0.402817	0.792231	8196.95	-0.311159	0.213692	-1.45611	0.145362	0.423243
gene_53614	dipeptidase	25.2538	29.1893	46.018	53.2161	24.3522	25.8068	25.6025	32.6873	24.4443	30.4363	47.5357	50.4278	40.0903	35.6057	38.7893	85.2533	27.2216	0.209365	0.449462	0.465812	0.64135	0.916104	49.617	0.204554	0.526101	0.388811	0.697416	0.87097
gene_78625	dipeptidase	8412.96	12934.3	15126.9	8094.47	11513	6920.17	6805.73	10235.9	13761.7	14805.4	9705.86	20439.2	15235.5	8527.26	6515.16	9240.98	10673.6	0.620483	0.30021	2.06683	0.0387499	0.257211	11610.7	-0.902057	0.363341	-2.48268	0.01304	0.116829
gene_43968	N-acetyltransferase	21580.4	25808	28244.3	19124.2	22543.7	20775.8	21421.9	27128.8	24631.8	25663.4	24612.7	31770.5	28349.8	16344.2	18834.1	22194.3	23694.2	0.258083	0.0943731	2.73471	0.00624347	0.0844173	23684.3	-0.562554	0.217298	-2.58885	0.00962963	0.099089
gene_44404	N-acetyltransferase	363.324	419.605	323.345	257.895	285.08	357.965	446.927	318.401	381.101	559.312	272.071	362.759	335.204	290.153	257.868	225.665	391.464	0.208352	0.335835	0.620401	0.534994	0.870018	290.62	-0.322024	0.236917	-1.35923	0.174075	0.462056
gene_45044	N-acetyltransferase	91.3048	128.512	80.2709	143.626	102.997	84.1862	86.7313	120.488	165.773	99.2737	72.7415	81.2811	86.79	99.1549	80.6134	251.11	109.908	0.492504	0.338201	1.45625	0.145325	0.52432	111.948	0.83672	0.558423	1.49836	0.134039	0.407111
gene_45242	N-acetyltransferase	135.052	160.244	883.474	717.502	133.893	140.991	130.271	150.82	211.135	118.775	843.551	933.757	873.114	618.202	762.063	772.24	147.648	0.246767	0.324945	0.759413	0.447605	0.821744	800.488	-0.299891	0.179729	-1.66857	0.0952019	0.343696
gene_56140	N-acetyltransferase	51.6613	107.583	30.8874	6.03067	71.8273	70.4629	12.6937	230.492	73.9106	18.345	0	92.6623	0	3.02774	0	15.0643	79.622	1.05698	1.05336	1.00345	0.315646	0.722871	18.4591	-2.35894	2.9235	-0.806887	0.419732
gene_46329	N-acetyltransferase	50.6334	34.27	117.075	38.8165	44.8344	54.0422	53.0237	33.5045	39.0526	30.2529	21.2639	183.947	146.013	34.1222	32.2557	50.0718	42.4517	-0.561528	0.379546	-1.47947	0.139014	0.511644	77.9456	-1.59139	0.815958	-1.95034	0.0511362	0.247727
gene_46627	N-acetyltransferase	136.886	230.721	149.251	35.0808	81.6741	149.413	179.573	125.578	135.062	431.523	30.4283	247.687	169.639	12.1487	22.1517	70.942	183.804	0.753783	0.644645	1.1693	0.242283	0.653812	92.1661	-2.09223	0.967009	-2.16361	0.0304947	0.185396
gene_49075	N-acetyltransferase	4747.68	4630.66	1064.11	1104.1	6267.06	4329.46	3646.53	5041.96	4010.36	4839.67	1001.2	1517.17	673.966	1005.87	427.689	1878.73	4689.17	-0.0361116	0.265941	-0.135788	0.891989	0.982274	1084.1	0.0532857	0.623683	0.0854371	0.931914	0.976932
gene_52380	N-acetyltransferase	281.977	238.998	114.745	76.6768	257.394	346.79	241.749	233.891	267.416	215.687	115.487	121.292	107.455	66.2486	78.3761	85.4056	260.488	-0.238615	0.254244	-0.938528	0.347973	0.753464	95.7108	-0.583729	0.261725	-2.23031	0.0257266	0.171132
gene_62752	N-acetyltransferase	317.44	321.845	295.031	213.547	287.774	394.55	269.997	286.998	357.889	320.648	235.611	339.941	309.542	212.844	204.074	223.721	319.643	0.0193168	0.253963	0.0760614	0.93937	0.990985	254.289	-0.463214	0.240308	-1.92759	0.0539066	0.254793
gene_63253	N-acetyltransferase	204.427	87.9735	42.2131	33.2472	257.168	237.12	118.992	100.519	93.3564	70.0449	50.1027	21.3646	55.172	29.2746	44.1017	26.3651	146.2	-1.21758	0.427856	-2.84576	0.00443052	0.0671364	37.7301	-0.354108	0.5617	-0.630422	0.528418	0.775797
gene_36714	N-acetyltransferase	1076.69	1017.9	730.54	837.95	1076.45	1109.59	1044.03	978.805	1123.61	951.292	844.947	563.817	782.857	884.26	981.037	648.552	1047.3	-0.0811112	0.133399	-0.608036	0.543163	0.873563	784.245	0.19709	0.294836	0.668474	0.503831	0.761193
gene_37008	N-acetyltransferase	917.453	956.829	829.743	626.458	1016.93	839.193	896.235	907.337	1017.62	945.528	689.529	858.424	941.276	665.179	639.491	574.704	937.141	0.060286	0.148758	0.405261	0.685285	0.930552	728.1	-0.403905	0.210005	-1.92331	0.0544416	0.255947
gene_34793	N-acetyltransferase	759.204	1363.96	818.108	830.188	875.749	659.952	741.913	1570.55	977.486	1543.85	250.445	1355.4	848.481	68.2095	29.6059	2392.75	1061.58	0.845472	0.271668	3.11215	0.0018573	0.0380973	824.148	0.0207576	1.41051	0.0147163	0.988259	0.995631
gene_42600	N-acetyltransferase	586.052	501.789	67.5074	484.389	153.301	38.3812	1566.47	782.251	588.161	134.957	20.5309	118.414	63.5767	786.188	416.312	250.666	543.921	-0.223683	1.19135	-0.187757	0.851067	0.97613	275.948	2.84992	0.743783	3.83166	0.000127283	0.00689876
gene_22687	N-acetyltransferase	2319.28	2164.03	3573.79	3117.62	2367.11	2424.49	2166.25	2049.07	2255.19	2187.83	4220.9	3196.85	3303.61	3372.48	3019.07	2961.32	2241.65	-0.100216	0.112167	-0.893453	0.371614	0.772335	3345.7	-0.197294	0.197084	-1.00107	0.316795	0.612469
gene_17678	N-acetyltransferase	678.015	599.394	242.863	229.342	735.042	589.996	709.007	653.945	560.755	583.483	230.152	261.589	236.848	268.518	246.547	172.96	638.705	-0.177685	0.174364	-1.01905	0.308181	0.716841	236.102	-0.0785048	0.272373	-0.288225	0.773175	0.908816
gene_26211	N-acetyltransferase	968.625	944.678	1158.7	1045.14	971.006	1026.09	908.776	1023.5	863.606	946.931	1168.01	1193.3	1114.79	1042.05	1107.27	986.095	956.651	-0.0364019	0.141406	-0.257429	0.796847	0.964531	1101.92	-0.147746	0.131072	-1.12721	0.259652	0.561573
gene_19294	N-acetyltransferase	88.8037	96.8599	24.2785	29.5697	58.9622	39.8096	167.639	64.283	150.435	75.8619	11.131	22.7577	38.9467	15.8964	41.675	31.1378	92.8318	0.12688	0.722476	0.175618	0.860594	0.976997	26.9241	0.285845	0.731232	0.390908	0.695865	0.870795
gene_29082	N-acetyltransferase	869.712	1417.48	705.66	1011.83	843.335	715.707	1050.09	1253.66	1513.87	1484.91	450.978	901.511	764.491	1234.16	1272.81	528.516	1143.6	0.705198	0.21691	3.2511	0.00114958	0.0270811	858.744	0.520924	0.483605	1.07717	0.281406	0.581014
gene_9723	N-acetyltransferase	3444.25	3926.98	826.113	1578.67	2427.17	3127.33	4778.25	3147.6	4612.3	4021.04	1251.43	401.464	825.449	2082.57	1993.28	660.15	3685.62	0.189356	0.3244	0.583712	0.559414	0.881923	1202.39	0.933804	0.621243	1.50312	0.132808	0.405758
gene_10058	N-acetyltransferase	432.977	363.603	377.777	372.841	417.461	394.866	486.605	360.956	380.289	349.565	417.079	373.36	342.893	388.711	328.423	401.388	398.29	-0.250826	0.17189	-1.45922	0.144504	0.523225	375.309	-0.0207583	0.20082	-0.103368	0.917671	0.972307
gene_10201	N-acetyltransferase	17.7474	54.9569	38.1753	177.594	23.4434	21.9468	7.85205	10.3596	153.368	1.14325	74.3712	21.7918	18.3628	199.915	309.124	23.7447	36.3521	1.62852	1.50342	1.08321	0.278717	0.689018	107.885	2.21308	1.00399	2.20428	0.0275046	0.17658
gene_3524	N-acetyltransferase	92.2607	101.769	15.9383	13.8238	54.7716	87.8925	134.118	216.886	61.6764	26.7439	10.0956	24.3742	13.3451	0	27.3932	14.0781	97.0147	0.142659	0.856001	0.166658	0.867639	0.978124	14.881	-0.198579	1.45564	-0.136421	0.891489
gene_3530	N-acetyltransferase	737.151	780.02	242.677	424.876	363.232	563.451	1284.77	863.561	1012.75	463.747	280.913	162.067	285.049	461.784	619.232	193.614	758.585	0.0819522	0.560877	0.146114	0.883831	0.981192	333.776	0.807075	0.534313	1.51049	0.130918	0.40346
gene_3727	N-acetyltransferase	1314.62	1163.69	1106.98	1229.1	1414.95	1308.18	1220.73	1257.51	970.461	1263.11	990.472	1192.74	1137.73	1138.56	1436.9	1111.85	1239.16	-0.176174	0.179976	-0.978879	0.32764	0.733028	1168.04	0.152089	0.204439	0.743932	0.456917	0.726469
gene_11901	N-acetyltransferase	152.061	434.722	1147	323.949	248.657	127.745	79.7829	618.256	364.296	321.613	760.45	1515.67	1164.89	456.816	209.412	305.619	293.392	1.51405	0.534259	2.83392	0.00459803	0.0689295	735.476	-1.82353	0.441065	-4.13437	3.55924e-05	0.00261129
gene_11904	N-acetyltransferase	49.8993	1.04672			41.1935	60.574	47.9305	3.14015	0	0							25.473	-5.5625	1.17592	-4.73034	2.24142e-06	0.000263641
gene_11917	N-acetyltransferase	26.9397	251.696	395.871	97.0913	24.0014	17.4268	39.3909	295.972	81.2389	377.877	306.972	550.144	330.497	139.993	78.4728	72.8084	139.318	3.22748	0.692547	4.66031	3.15737e-06	0.000344851	246.481	-2.02392	0.439322	-4.60691	4.08697e-06	0.000469326
gene_4377	N-acetyltransferase	455.966	823.826	336.345	208.948	387.099	612.795	368.003	800.956	588.952	1081.57	293.657	419.996	295.381	227.489	255.158	144.198	639.896	0.853138	0.356839	2.39082	0.0168107	0.156651	272.647	-0.682311	0.349019	-1.95494	0.0505906	0.246386
gene_4378	N-acetyltransferase	11.0922	6.76141	343.651	148.665	8.109	14.9998	10.1678	13.3465	6.93769	0	137.382	474.732	418.839	97.3985	126.083	222.515	8.9268	-0.70949	1.40328	-0.505594	0.613142		246.158	-1.2098	0.607762	-1.99058	0.046527	0.236049
gene_4415	N-acetyltransferase	4795.75	4107.97	5306.17	4621.65	4631.75	5271.84	4483.65	3880.63	4328.69	4114.6	5636.42	4680.04	5602.06	4848.3	4852.52	4164.12	4451.86	-0.223381	0.126436	-1.76676	0.077269	0.382592	4963.91	-0.199419	0.171497	-1.16281	0.244907	0.546325
gene_4784	N-acetyltransferase	93.1774	74.8043	11.2432	1.23771	164.893	43.5817	71.0576	77.559	143.13	3.72376	22.3847	5.1394	6.20553	2.39435	1.31878	0	83.9908	-0.315883	1.13842	-0.277475	0.781415	0.961128	6.24046	-3.15015	1.37842	-2.28533	0.0222935
gene_4785	N-acetyltransferase			5.78854	5.9946							2.54808	4.09794	10.7196	5.9176	5.36551	6.70068							5.89157	0.0640165	0.978948	0.0653931	0.947861
gene_74280	N-acetyltransferase	6.35347	9.52946			4.31371	7.32657	7.42014	10.4713	10.5554	7.56163							7.94146	0.591735	0.819393	0.722162	0.470195
gene_69393	N-acetyltransferase	0.697091	4.49864			2.09127	0	0	6.07127	6.11868	1.30596							2.59786	2.72288	2.18521	1.24605	0.212745
gene_76439	N-acetyltransferase	93.7072	146.137	420.009	127.77	48.1017	32.0857	200.934	117.179	89.6968	231.535	84.26	709.421	466.346	151.239	102.212	129.859	119.922	0.642996	0.829671	0.775001	0.438339	0.815271	273.89	-1.71576	0.750585	-2.2859	0.0222602	0.157371
gene_70263	N-acetyltransferase	3.08837	2.14627			0	1.82836	7.43675	1.04122	0	5.39757							2.61732	-0.517953	2.4848	-0.208448	0.834879
gene_70267	N-acetyltransferase	676.557	1732.26	208.14	35.1076	554.83	750.345	724.497	2627.71	497.323	2071.76	24.2464	399.895	200.28	37.0875	23.0338	45.2017	1204.41	1.35643	0.589502	2.30097	0.0213931	0.183486	121.624	-2.5674	0.934107	-2.7485	0.0059868	0.0757586
gene_76501	N-acetyltransferase	11.2918	66.1249	881.234	137.006	3.42554	2.75224	27.6976	107.705	11.6045	79.0655	128.154	1520.41	995.142	108.095	62.7238	240.198	38.7083	2.55973	1.22938	2.08212	0.0373312	0.252122	509.12	-2.68606	0.907428	-2.96008	0.00307556	0.0520049
gene_70661	N-acetyltransferase	741.093	833.326	753.467	577.499	729.008	894.386	599.884	928.416	766.141	805.42	695.334	715.071	849.997	642.024	627.443	463.03	787.209	0.168783	0.225489	0.748521	0.454146	0.825897	665.483	-0.382938	0.235028	-1.62933	0.103243	0.358044
gene_81223	N-acetyltransferase	11.7478	25.1942	17.4991	10.0685	15.295	1.84016	18.1082	69.1222	4.28979	2.17061	6.06281	36.5155	9.91896	8.32373	17.884	3.99768	18.471	1.10299	1.54016	0.71615	0.473899	0.837001	13.7838	-0.763584	1.05031	-0.727006	0.467223
